# Supplementary material
Source: PubMed Central journal article supplement (PMC3047622)
Supplement: cc0917_3611SD1.pdf [file cc0917_3611SD1.pdf]

# Supplemental Figure 1

**A**

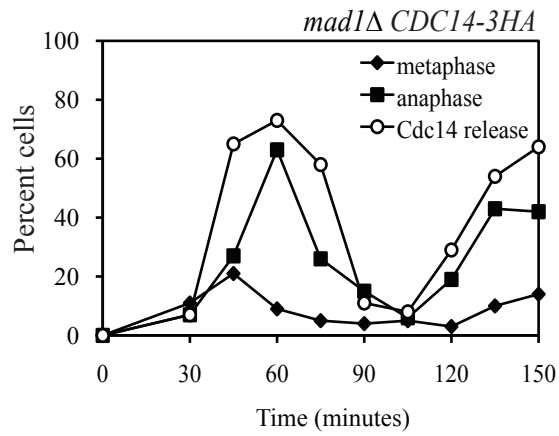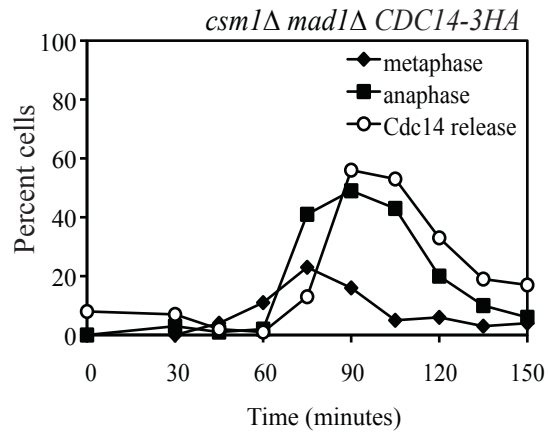

**B**

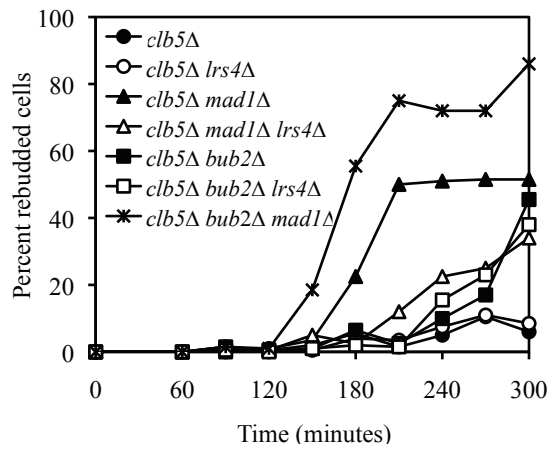

**Supplemental Table. Strain derivatives of W303 used in this study**

Note: All strains are derivatives of W303 and share the same markers as A2587 unless otherwise noted.

| <b>Strain</b> | <b>Relevant genotype</b>                                                                              |
|---------------|-------------------------------------------------------------------------------------------------------|
| A1794         | MATa, <i>clb5::URA3, CDC14-3HA</i>                                                                    |
| A2587         | MATa, <i>ade2-1, leu2-3, ura3, trp1-1, his3-11,15, can1-100, GAL, psi+</i> ,                          |
| A2853         | MATa, <i>mad1::URA3, CDC14-3HA</i>                                                                    |
| A5244         | MATa, <i>pURA3-TetR-GFP::LEU2, CenIV::tetOx448::URA3</i>                                              |
| A8604         | MATa, <i>clb5::URA3, mad1::URA3, CDC14-3HA</i>                                                        |
| A8605         | MATa, <i>clb5::URA3, bub2::HIS3, CDC14-3HA</i>                                                        |
| A8606         | MATa, <i>clb5::URA3, mad1::URA3, bub2::HIS3, CDC14-3HA</i>                                            |
| A8623         | MATa, <i>csml::KanMX6</i>                                                                             |
| A12312        | MATa, <i>pURA3-TetR-GFP::LEU2, CenIV::tetOx448::URA3, pGAL-3HA-MAM1::KanMX6, pGAL-3MYC-CDC5::URA3</i> |
| A13838        | MATa, <i>LRS4-6HA::HIS3MX6</i>                                                                        |
| A13981        | MATa, <i>mad1::URA3, csml::KANMX, CDC14-3HA</i>                                                       |
| A13986        | MATa, <i>lrs4::KanMX6</i>                                                                             |
| A14204        | MATa, <i>LRS4-6HA, cdc14-3</i>                                                                        |
| A14561        | MATa, <i>clb5::URA3, lrs4::KANMX6, CDC14-3HA</i>                                                      |
| A14962        | MATa, <i>clb2::URA3, bub2::HIS3, lrs4::KANMX, CDC14-3HA</i>                                           |
| A14564        | MATa, <i>clb5::URA3, mad1::URA3, lrs4::KANMX, CDC14-3HA</i>                                           |
| A15087        | MATa, <i>csml::CSM1-9MYC::TRP1</i>                                                                    |
| A15127        | MATa, <i>LRS4-6HA-HIS3::MX6, Ndc80-GFP::URA3</i>                                                      |
| A15974        | MATa, <i>LRS4-6HA::HIS3MX6, csml::KanMX6</i>                                                          |
| A15976        | MATa, <i>csml::CSM1-9MYC::TRP1, lrs4::KanMX6</i>                                                      |
| A16485        | MATa, <i>ipl1-321, pURA3-TetR-GFP::LEU2, CenIV::tetOx448::URA3</i>                                    |
| A16736        | MATa, <i>pURA3-TetR-GFP::LEU2, CenIV::tetOx448::URA3, SPC42-GFP::TRP1, cdc14-3</i>                    |
| A16755        | MATa, <i>LRS4-6HA::HIS3MX6, SPC42-GFP::TRP1, cdc15-2</i>                                              |
| A16802        | MATa, <i>SPC42-GFP::TRP1, LRS4-6HA::HIS3MX6, cdc14-3</i>                                              |

|        |                                                                                                  |
|--------|--------------------------------------------------------------------------------------------------|
| A17061 | MATa, <i>lrs4::KanMX6, PDS1-13MYC::HIS3</i>                                                      |
| A17063 | MATa, <i>csml::KanMX6, PDS1-13MYC::HIS3</i>                                                      |
| A17064 | MATa, <i>PDS1-13MYC::HIS3</i>                                                                    |
| A17569 | MATa, <i>SPC42-GFP::TRP1, lrs4::LRS4-6HA::HIS3MX6, cdc14-3, ndc10-1</i>                          |
| A18120 | MATa, <i>lrs4::KanMX6, csml::KanMX6</i>                                                          |
| A18996 | MATa, / YCplac 33 <i>CEN4, ARS1, URA3</i>                                                        |
| A18998 | MATa, <i>lrs4::KanMX / YCplac 33 CEN4, ARS1, URA3</i>                                            |
| A19000 | MATa, <i>csml::kanMX / YCplac33 CEN4, ARS1, URA3</i>                                             |
| A19002 | MATa, <i>csml::kanMX, lrs4::KanMX / YCplac33 CEN4, ARS1, URA3</i>                                |
| A19004 | MATa / YRp17 <i>ARS1, TRP1, URA3</i>                                                             |
| A19005 | MATa, <i>lrs4::KanMX6 / YRp17 ARS1, TRP1, URA3</i>                                               |
| A19006 | MATa, <i>csml::KanMX6 / YRp17 ARS1, TRP1, URA3</i>                                               |
| A19007 | MATa, <i>lrs4::KanMX6, csml::KanMX6 / YRp17 ARS1, TRP1, URA3</i>                                 |
| A19297 | MATa, <i>LRS4-6HA, DSN1-13MYC, cdc14-3</i>                                                       |
| A19333 | MATa, <i>DSN1-13MYC, cdc14-3</i>                                                                 |
| A20432 | MATa, <i>SIR21-13MYC::KanMX, NDC80-GFP::URA3</i>                                                 |
| A20433 | MATa, <i>TOF2-13MYC::KanMX, NDC80-GFP::URA3</i>                                                  |
| A20436 | MATa, <i>mcm21::KanMX / YCplac33 CEN4, ARS1, URA3</i>                                            |
| A23340 | MATa, <i>pURA3-TetR-GFP::LEU2, CenIV::tetOx448::URA3, SPC42-GFP::TRP1, cdc14-3, lrs4::KanMX6</i> |
| A23341 | MATa, <i>pURA3-TetR-GFP::LEU2, CenIV::tetOx448::URA3, SPC42-GFP::TRP1, cdc15-2</i>               |
| A24385 | MATa, <i>csml::KanMX6, pURA3-TetR-GFP::LEU2, CenIV::tetOx448::URA3</i>                           |
| A24386 | MATa, <i>lrs4::KanMX6, csml::KanMX6, pURA3-TetR-GFP::LEU2, CenIV::tetOx448::URA3</i>             |
| A24384 | MATa, <i>FOB1-13MYC::KanMX, NDC80-GFP::URA3</i>                                                  |
